# Supplementary material
Source: PubMed Central journal article supplement (PMC4001400)
Supplement: supp_tpc.113.120881_tpc120881Supplemental2.pdf [file supp_tpc.113.120881_tpc120881Supplemental2.pdf]

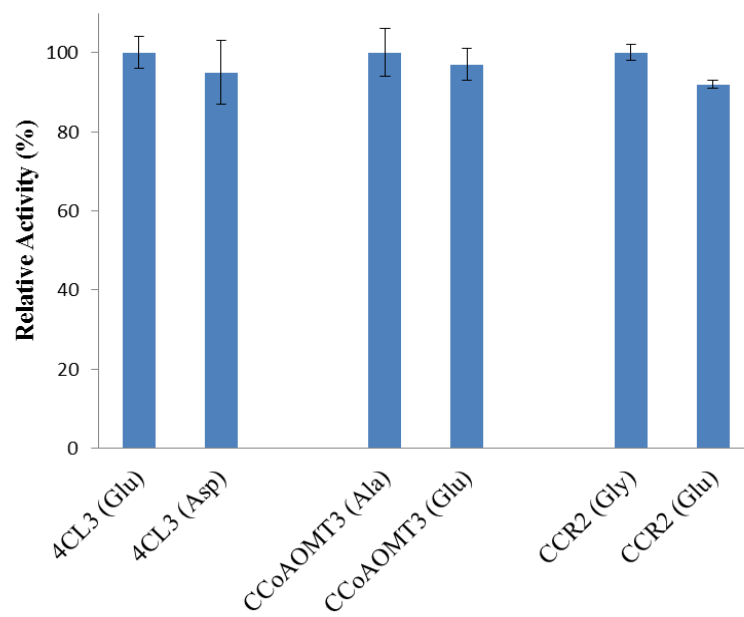

**Supplemental Figure 1.** Single nucleotide polymorphisms (SNP) in the monolignol pathway enzymes of *P. trichocarpa* Nisqually-1 do not alter their enzyme activities. The error bars represent standard error of three technical repeats.

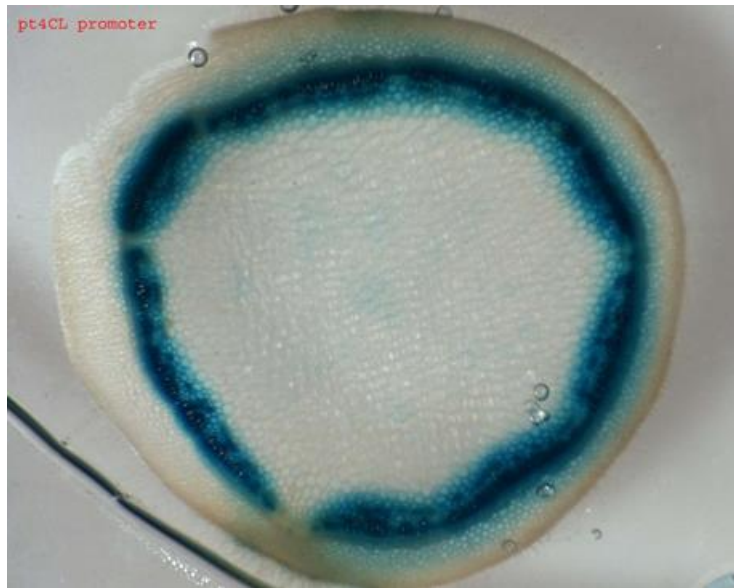

**Supplemental Figure 2.** Xylem specific expression of GUS activity in transgenic *N. tabacum* transformed with *pBI121-4CLXP* construct.

**Supplemental Table 1.** The expression and purification systems used for the production of the 21 recombinant proteins in the monolignol biosynthetic pathway of *P. trichocarpa*

| Enzyme family | Gene name       | GenBank accession number | Expression System    | Purification System |
|---------------|-----------------|--------------------------|----------------------|---------------------|
| PAL           | <i>PAL1</i>     | EU603319                 | <i>E. coli</i>       | GST tag             |
|               | <i>PAL2</i>     | EU603321                 | <i>E. coli</i>       | GST tag             |
|               | <i>PAL3</i>     | EU603318                 | <i>E. coli</i>       | GST tag             |
|               | <i>PAL4</i>     | EU603322                 | <i>E. coli</i>       | GST tag             |
|               | <i>PAL5</i>     | EU603320                 | <i>E. coli</i>       | GST tag             |
| C4H           | <i>C4H1</i>     | EU603304                 | <i>s. cerevisiae</i> | Microsome           |
|               | <i>C4H2</i>     | EU603302                 | <i>s. cerevisiae</i> | Microsome           |
| 4CL           | <i>4CL3</i>     | EU603298                 | <i>E. coli</i>       | HIS tag             |
|               | <i>4CL5</i>     | EU603299                 | <i>E. coli</i>       | HIS tag             |
| HCT           | <i>HCT1</i>     | EU603313                 | <i>E. coli</i>       | GST tag             |
|               | <i>HCT6</i>     | EU603314                 | <i>E. coli</i>       | GST tag             |
| C3H           | <i>C3H3</i>     | EU603301                 | <i>s. cerevisiae</i> | Microsome           |
| CCoAOMT       | <i>CCoAOMT1</i> | EU603307                 | <i>E. coli</i>       | HIS tag             |
|               | <i>CCoAOMT2</i> | EU603309                 | <i>E. coli</i>       | HIS tag             |
|               | <i>CCoAOMT3</i> | EU603308                 | <i>E. coli</i>       | HIS tag             |
| CCR           | <i>CCR2</i>     | EU603310                 | <i>E. coli</i>       | GST tag             |
| CAld5H        | <i>CAld5H1</i>  | EU603312                 | <i>s. cerevisiae</i> | Microsome           |
|               | <i>CAld5H2</i>  | EU603311                 | <i>s. cerevisiae</i> | Microsome           |
| COMT          | <i>COMT2</i>    | EU603317                 | <i>E. coli</i>       | HIS tag             |
| CAD           | <i>CAD1</i>     | EU603306                 | <i>E. coli</i>       | GST tag             |
|               | <i>CAD2</i>     | EU603305                 | <i>E. coli</i>       | GST tag             |

**Supplemental Table 2.** The SNP allelic variants of the monolignol biosynthetic enzymes in *P. trichocarpa*

| Gene            | Amino Acids | Scaffold    | Base     | Genome Sequence | RNA-Seq Sequences |
|-----------------|-------------|-------------|----------|-----------------|-------------------|
| <i>PAL1</i>     | Lys/Lys     | scaffold_6  | 10034330 | T               | Y                 |
| <i>PAL2</i>     | Leu/Leu     | scaffold_8  | 2053326  | T               | Y                 |
|                 | Thr/Thr     | scaffold_10 | 19775321 | T               | Y                 |
|                 | Ala/Ala     | scaffold_10 | 19775807 | C               | Y                 |
|                 | Lys/Lys     | scaffold_10 | 19775861 | A               | R                 |
|                 | Tyr/Tyr     | scaffold_10 | 19775906 | C               | Y                 |
| <i>PAL5</i>     | Thr/Thr     | scaffold_10 | 19781996 | A               | C                 |
|                 | Asn/Asn     | scaffold_10 | 19782824 | C               | T                 |
|                 | Gln/Gln     | scaffold_10 | 19783271 | A               | G                 |
| <i>C4H1</i>     | Leu/Leu     | scaffold_13 | 15378110 | G               | R                 |
|                 | Phe/Phe     | scaffold_13 | 15381180 | G               | Y                 |
| <i>C4H2</i>     | Gly/Gly     | scaffold_19 | 15705883 | T               | W                 |
|                 | Phe/Leu     | scaffold_19 | 15707492 | A               | Y                 |
| <i>4CL3</i>     | Thr/Thr     | scaffold_1  | 5571743  | T               | Y                 |
|                 | Glu/Asp     | scaffold_1  | 5571941  | C               | S                 |
|                 | Tyr/Tyr     | scaffold_1  | 5572191  | C               | Y                 |
|                 | Lys/Lys     | scaffold_1  | 5572238  | C               | Y                 |
| <i>4CL5</i>     | Gly/Gly     | scaffold_3  | 17691787 | A               | R                 |
| <i>C3H3</i>     | Pro/Pro     | scaffold_6  | 2004783  | A               | R                 |
|                 | Ser/Ser     | scaffold_6  | 2004789  | T               | Y                 |
| <i>CCoAOMT1</i> | Tyr/Tyr     | scaffold_9  | 8859033  | A               | R                 |
|                 | Lys/Lys     | scaffold_9  | 8859249  | T               | Y                 |
| <i>CCoAOMT3</i> | Ala/Glu     | scaffold_8  | 8961572  | G               | K                 |
| <i>CCR2</i>     | Gly/Glu     | scaffold_3  | 17211828 | G               | R                 |
| <i>CAld5H1</i>  | Leu/Phe     | scaffold_5  | 8721692  | G               | R                 |
|                 | Thr/Pro     | scaffold_5  | 8722148  | T               | K                 |
| <i>CAld5H2</i>  | Ala/Ala     | scaffold_7  | 13783347 | A               | M                 |
|                 | Leu/Leu     | scaffold_7  | 13784182 | C               | Y                 |
|                 | Ser/Ser     | scaffold_7  | 13784196 | T               | Y                 |
|                 | Leu/Met     | scaffold_7  | 13784320 | T               | W                 |
|                 | Glu/Glu     | scaffold_7  | 13784361 | G               | R                 |
| <i>COMT2</i>    | Val/Val     | scaffold_12 | 371215   | G               | S                 |
|                 | Ser/Ser     | scaffold_12 | 372954   | T               | Y                 |

The rows not highlighted show the synonymous allelic variants where the SNPs do not alter the amino-acid sequences. The highlighted rows show the non-synonymous allelic variants where the SNPs cause a change in the amino-acid sequences. Non-synonymous SNP allelic variants were identified for *4CL3*, *CCoAOMT3*, *CCR2*, *CAld5H1* and *CAld5H2*. These allelic variants were subsequently cloned, expressed recombinantly, and their activities assayed to study if these allelic variants have the same or different activities. The scaffold numbers and SNP locations are based on *P. trichocarpa* genome V2.

**Supplemental Table 3.** The optimal reaction conditions and cofactors for the reaction and inhibition kinetic assays of the 10 monolignol biosynthetic enzyme families (Liu et al., 2012).

| Monolignol Enzyme Family | Cofactors                                     | Optimum Assay Condition                       |
|--------------------------|-----------------------------------------------|-----------------------------------------------|
| PAL                      | –                                             | 50 mM Bis-Tris buffer (pH 8.5), 45 °C         |
| C4H                      | 2 mM NADPH                                    | 50 mM sodium phosphate buffer (pH 6.0), 30 °C |
| 4CL                      | 2 mM MgCl <sub>2</sub> , 2 mM ATP, 0.2 mM CoA | 50 mM Tris-HCl buffer (pH 7.5), 37 °C         |
| HCT                      | 0.5 mM shikimic acid, 2 mM NADPH              | 50 mM MES buffer (pH 5.9), 37 °C              |
| CCR                      | 2 mM NADPH                                    | 50 mM MES buffer (pH 6.1), 45 °C              |
| C3H                      | 2 mM NADPH                                    | 50 mM sodium phosphate (pH 7.0), 20 °C        |
| CCoAOMT                  | 0.25 mM SAM, 2 mM MgCl <sub>2</sub>           | 50 mM Tris-HCl buffer (pH 7.5), 30 °C         |
| CAld5H                   | 2 mM NADPH                                    | 50 mM Citrate buffer (pH 5.4), 30 °C          |
| AldOMT                   | 0.25 mM SAM, 2 mM MgCl <sub>2</sub>           | 50 mM Tris-HCl buffer (pH 7.5), 30 °C         |
| CAD                      | 2 mM NADPH                                    | 50 mM MES buffer (pH 6.1), 24 °C              |

## REFERENCE

**Liu, J., Shi, R., Li, Q., Sederoff, R.R., Chiang, V.L.** (2012). A standard reaction condition and a single HPLC separation system are sufficient for estimation of monolignol biosynthetic pathway enzyme activities. *Planta* **236**: 879-885.

**Supplemental Table 4.** The PC-IDMS derived absolute quantification of the monolignol enzymes in SDX of *P. trichocarpa*. PAL4|5 indicates the sum of PAL4 and PAL5 protein abundance (Shuford et al., 2012) because they cannot be differentiated by PC-IDMS.

| Monolignol enzymes | Concentration (nM) |
|--------------------|--------------------|
| 4CL3               | 1195               |
| 4CL5               | 142.2              |
| C3H3               | 123.5              |
| C4H1               | 109.3              |
| C4H2               | 62.44              |
| CAD1               | 436.1              |
| CAD2               | 8.978              |
| CAld5H1            | 117.5              |
| CAld5H2            | 125.9              |
| CCoAOMT1           | 583.9              |
| CCoAOMT2           | 408.5              |
| CCoAOMT3           | 82.96              |
| CCR2               | 159.8              |
| COMT2              | 8219               |
| HCT1               | 170                |
| HCT6               | 46.96              |
| PAL1               | 40.93              |
| PAL2               | 221.5              |
| PAL3               | 30.18              |
| PAL4 5             | 223.2              |

## REFERENCE

**Shuford, C.M., Li, Q., Sun, Y., Chen, H., Wang, J., Shi, R., Sederoff, R.R., Chiang, V.L., Muddiman, D.C. (2012).** Comprehensive Quantification of Monolignol-Pathway Enzymes in *Populus trichocarpa* by Protein Cleavage Isotope Dilution Mass Spectrometry. *J. Proteome Res.* **11:** 3390-3404.

**Supplemental Table 5.** Primers used in this study.

| <b>Primer Name</b>             | <b>Primer Sequence</b>                     |
|--------------------------------|--------------------------------------------|
| <i>4CLP-F</i>                  | CAAGCTTAAAGAGAAGTTAGGTCACCTCCTCC           |
| <i>4CLP-R</i>                  | TGGATCC CATTATGGCGTCCATTGCGGGCT            |
| <i>PAL739479-s</i>             | CCTTACCACGTAGTGGCAAGGATTTGTGGCTCTTCCTTTTC  |
| <i>PAL739479-a</i>             | AAATCCTTGCCACTACGTGGTAAGGGTAGAGCCAAAACAAG  |
| <i>PAL739479-<sup>*s</sup></i> | AAATACTTGCCACTAGGTGGTATGGATGGAGCTACTAACAG  |
| <i>PAL739479-<sup>*a</sup></i> | CCATACCACCTAGTGGCAAGTATTTTCATCTGTCTCTGCTCC |
| <i>PAL820245-s</i>             | CCTTTTAAACGTAAGAGCTACGATTTGTGGCTCTTCCTTTTC |
| <i>PAL820245-a</i>             | AAATCGTAGCTCTTACGTTAAAAGGGTAGAGCCAAAACAAG  |
| <i>PAL820245-<sup>*s</sup></i> | AAATAGTAGCTCTTAGGTTAAATGGATGGAGCTACTAACAG  |
| <i>PAL820245-<sup>*a</sup></i> | CCATTTAACCTAAGAGCTACTATTTTCATCTGTCTCTGCTCC |
| <i>i7-SF</i>                   | ACTAGT CCATTTTGGCATAGAGGATCATCG            |
| <i>i7-M1</i>                   | TCGAGCCTCCTCTGACAACCTCC                    |
| <i>i7-M2</i>                   | AGTTGTCAGAGGAGGCTCGATTACGTTAAAGCAGCTCAAAGT |
| <i>i7-SR</i>                   | GAGCTC GACAGAGTTGATTTCTCGTTCG              |
| <i>i7-ASF</i>                  | GACTGTCGACCCATTTTGGCATAGAGGATCATCG         |
| <i>i7-ASR</i>                  | TGCAGGATCCGACAGAGTTGATTTCTCGTTCG           |

s=sense strand; a=antisense strand; \*=amiRNA\* sequence (Shi et al., 2010)

### **Supplemental Method 1.** Chemical and biochemical synthesis of monolignol precursors for enzymatic assays

Phenylalanine, cinnamic acid, 4-coumaric acid, caffeic acid, ferulic acid, sinapic acid, coniferaldehyde, coniferyl alcohol, sinapaldehyde and sinapyl alcohol were purchased from Sigma Aldrich (St. Louis MO, USA). For all compounds except the alcohols, product ion spectra were acquired for the  $[M+H]^+$  molecular ion of each synthetic standard using a TSQ Quantum triple-stage quadrupole mass spectrometer (Thermo Scientific, San Jose, CA). For the alcohols, product ion spectra were acquired for the  $[M-OH]^+$  molecular ion. Collision energy of 10 eV and 1.5 mtorr of argon were used in acquiring all spectra, except for the acyl-CoA derivatives, which utilized collision energy of 30 eV.

Synthesis of 5-hydroxyferulic acid: Pyridine (1 mL), piperidine (5  $\mu$ L), and aniline (10  $\mu$ L) were added successively to a stirred mixture of 5-hydroxyvanillin (50 mg, 1 mmol) and malonic acid (75 mg). The resulting solution was stirred at 25 °C for 1 week. After acidification with 1 N HCl to pH 2, the resulting mixture was extracted with 10 mL of ethyl acetate and then purified over a silica column, yielding 63 mg 5-hydroxyferulic acid. MS *m/z* (%) 211 ( $[M+H]^+$ , 15), 193 (100), 169 (1), 160 (18), 133 (8).

4-Coumaraldehyde, 4-coumaryl alcohol, caffealdehyde, caffeyl alcohol, 5-hydroxyconiferaldehyde, and 5-hydroxyconiferyl alcohol were chemically synthesized in our lab as described in Li et al., (2001). Briefly, 4-acetoxy-benzaldehyde (1 mmol) and (1, 3-dioxolan-2-yl-methyl)-triphenylphosphonium bromide (1 mmol) were dissolved in  $CH_2Cl_2$  (20 mL). Solid  $K_2CO_3$  (1 mmol) and 18-crown-6 (0.01 mmol) were added. The reaction mixture was kept at room temperature for 6 hr, and filtered to separate the organic phase from the solid phase. Aqueous HCl (10%, 10 mL) was added to the organic portion and stirred in the mixture at 25°C for 4 hr. The mixture was then diluted with 10 mL  $H_2O$  and extracted three times with  $CH_2Cl_2$ . The combined organic layers were washed with saturated  $NaHCO_3$  and saturated aqueous NaCl solutions successively, then dried over  $MgSO_4$  under vacuum. A silica gel column was used for purification. The 4-acetoxycoumaraldehyde (0.1 g) was dissolved in 20 mL of 0.2 M KOH in 95% EtOH, and stirred for 2 hr under  $N_2$ . The solvent was removed under vacuum, and the mixture diluted with 10 mL  $H_2O$  and extracted with ethyl acetate (10 mL  $\times$ 3). The combined organic layers were dried over  $Na_2SO_4$  and evaporated to give 4-coumaraldehyde (61 mg, 41%



yield). 4-Coumaryl alcohol was synthesized from 4-acetoxycoumaraldehyde according to the procedure described by Daubresse et al. (1994). Briefly, 4-acetoxycoumaraldehyde (0.1 g) was dissolved in MeOH along with  $\text{KH}_2\text{PO}_4$ .  $\text{NaBH}_4$  (50 mg) was slowly added at  $0^\circ\text{C}$ . Cold water was added and MeOH was removed under vacuum and the mixture was extracted with  $\text{CH}_2\text{Cl}_2$ , washed with  $\text{H}_2\text{O}$ , dried and evaporated to give 4-acetyloxy-2-propen-1-ol (90 mg). 4-Acetyloxy-2-propen-1-ol (50 mg) was dissolved in 20 mL of 0.2 M KOH in 95% EtOH, and stirred for 2 hr under  $\text{N}_2$ . The solvent was removed under vacuum, and the mixture diluted with 10 mL  $\text{H}_2\text{O}$  and extracted with ethyl acetate (20 mL  $\times 3$ ). The combined organic layers were dried over  $\text{Na}_2\text{SO}_4$  and purified on a silica gel column to give 4-coumaryl alcohol (62 mg, 41% yield).

Caffealdehyde and caffeoyl alcohol, 5-hydroxyconiferaldehyde, and 5-hydroxyconiferyl alcohol were synthesized using the same procedure with overall yield of 40–53%. 4-Coumaraldehyde: MS  $m/z$  (%) 149 ( $[\text{M}+\text{H}^+]^+$ , 100), 131 (32), 121 (7), 107 (3), 103 (7), 93 (1), 91 (1), 77 (1), 55 (4). Caffealdehyde: MS  $m/z$  (%) 165 ( $[\text{M}+\text{H}^+]^+$ , 45), 147 (100), 119 (14), 91 (6), 55 (1). 5-Hydroxyconiferaldehyde: MS  $m/z$  (%) 195 ( $[\text{M}+\text{H}^+]^+$ , 85), 177 (100), 167 (3), 163 (11), 149 (6), 145 (2), 135 (1), 131 (5), 121 (1), 117 (1), 107 (1), 106 (1), 103 (5), 55 (1). 4-Coumaryl alcohol: MS  $m/z$  (%) 133  $[\text{M}-\text{OH}]^{1+}$ , 100), 115 (1), 105 (21), 103 (2), 79 (2), 77 (1). Caffeoyl alcohol: MS  $m/z$  (%) 149  $[\text{M}-\text{OH}]^{1+}$ , 100), 131 (96), 103 (31), 77 (2), 73 (1). 5-Hydroxyconiferyl alcohol: MS  $m/z$  (%) 179  $[\text{M}-\text{OH}]^{1+}$ , 70), 164 (1), 161 (4), 147 (100), 133 (2), 119 (9), 91 (4).

4-Coumaroyl-CoA, caffeoyl-CoA and feruloyl-CoA were enzymatically synthesized from each acid (Beuerle and Pichersky 2002). Purified *P. trichocarpa* 4-coumarate: CoA ligase-3 (4CL3) (Shuford et al. 2012) recombinant protein from *Escherichia coli* was used to biochemically synthesize 4-coumaroyl-CoA and caffeoyl-CoA. Briefly, 6 mg acid, 4 mg coenzyme A hydrate (CoA), and 14 mg ATP were dissolved in a total volume of 40 ml of 50 mM Tris-HCl (pH 7.5) buffer containing 2.5 mM  $\text{MgCl}_2$ . 0.3 mg of purified protein was added to the mixture to start the reaction. After 30 min at  $37^\circ\text{C}$ , 1.6 g ammonium acetate was added to stop the reaction. The resulting mixture was purified by using an SPE cartridge (Chromabond  $\text{C}_{18}$  ec, Macherey-Nagel). Yields of 1.7 mg 4-coumaroyl-CoA, 2.3 mg caffeoyl-CoA and 1.5 mg feruloyl-CoA were obtained, which represented 36%, 48%, and 36% yield respectively, based on CoA used in the reaction. The purity and identity of all synthesized products were confirmed by

tandem MS. Product ion spectra were acquired directly for the  $[M+H]^{++}$  molecular ion of each compound on a TSQ Quantum Triple Quadrupole mass spectrometer (Thermo Scientific) at a collision energy of 10 eV and 1.5 mtorr of argon. 4-Coumaroyl-CoA: MS  $m/z$  (%) 914 ( $[M+H]^{++}$ , 56.5), 768 (8.7), 505, (9.9), 428 (40.0), 407 (100), 341 (6.3), 305 (21.1), 261 (10.9). Caffeoyl-CoA: MS  $m/z$  (%) 930 ( $[M+H]^{++}$ , 60.2), 768 (20.5), 521 (8.8), 428 (43.3), 423 (100), 410 (7.0), 341 (11.5), 321 (20.6), 261 (14.8). Feruloyl-CoA: MS  $m/z$  (%) 944 ( $[M+H]^{++}$ , 56.0), 768 (7.0), 535 (11.7), 437 (100), 428 (48.8), 410 (7.4), 335 (19.4), 261 (13.3), 177 (8.3). 5-Hydroxyferuloyl-CoA: MS  $m/z$  (%) 960 ( $[M+H]^{++}$ , 5), 768 (3), 551 (3), 453 (100), 428 (41), 410 (3), 351 (19), 341 (8), 261 (19), 193 (8). Sinapoyl-CoA: MS  $m/z$  (%) 974 ( $[M+H]^{++}$ , 7), 768 (5), 467 (100), 428 (40), 365 (21), 341 (6), 261 (17), 207 (14).

4-coumaroyl shikimic acid and caffeoyl shikimic acid were enzymatically synthesized using 6 mg 4-coumaroyl-CoA, or 6 mg caffeoyl-CoA and 2 mg shikimic acid in a volume of 20 mL of potassium phosphate buffer (pH 7). The reaction was started by the addition of purified HCT6 (Shuford et al., 2012) (0.5 mg). After incubating for 20 min at 30 °C, the product was extracted three times with 20 mL of ethyl acetate. The organic layer was recovered, then dried over  $Na_2SO_4$  and evaporated to give 1.5 mg 4-coumaroyl shikimic acid (65% yield) or 1.2 mg caffeoyl shikimic acid (54% yield). 4-Coumaroyl shikimic acid: MS  $m/z$  (%) 321 ( $[M+H]^{++}$ , 18.2), 303 (3.5), 165 (5.6), 147 (100), 139 (1.6), 119 (2.3). Caffeoyl shikimic acid: MS  $m/z$  (%) 337 ( $[M+H]^{++}$ , 20.2), 319 (3.0), 181 (4.1), 163 (100), 145 (2.8), 145 (2.8), 139 (1.4), 117 (1.0).

## REFERENCES

- Li, L., Cheng, X.F., Leshkevich, J., Umezawa, T., Suzuki, S., Harding, S.A., and Chiang, C.L.** (2001). The last step of syringyl monolignol biosynthesis in angiosperm dicots is regulated by a novel gene encoding sinapyl alcohol dehydrogenase. *Plant Cell* **13**: 1567-1585.
- Beuerle, T., Pichersky, E.** (2002). Purification and characterization of benzoate:coenzyme A ligase from *Clarkia breweri*. *Arch. Biochem. Biophys.* **15**: 258-264.
- Shuford, C.M., Li, Q., Sun, Y., Chen, H., Wang, J., Shi, R., Sederoff, R.R., Chiang, V.L., Muddiman, D.C.** (2012). Comprehensive Quantification of Monolignol-Pathway Enzymes in

Populus trichocarpa by Protein Cleavage Isotope Dilution Mass Spectrometry. J. Proteome Res.  
**11:** 3390-3404.

## **Supplemental Method 2.** Generation of transgenic *P. trichocarpa* with xylem specific PAL downregulation

Assembly of a xylem-specific transformation construct: To generate a transformation construct with xylem-specific expression, a 1.5kb promoter region of *4CL3* (POPTR\_0001s07400) was amplified from *P. trichocarpa* genomic DNA with primers *4CLP-F* and *4CLP-R* (see Supplemental Table 5 online) and replaced the 35S promoter in the transformation construct *pBII21* and *MIR408-pBII21* (Shi et al., 2010) to generate *pBII21-4CLXP* and *MIR408-pBII21-4CLXP*. The xylem specific expression of this *4CL* promoter was validated using transgenic *Nicotiana tabacum* transformed with *pBII21-4CLXP* (Horsch et al., 1985) and GUS staining (Li et al., 2011; see Supplemental Figure 2 online).

Generation of transgenic *P. trichocarpa* with xylem-specific individual downregulation of *PAL1* or *PAL2*: To generate transgenic *P. trichocarpa* plants downregulated in either *PAL1* or *PAL2* expression, amiRNAs (21 nt) targeting *PAL1* and *PAL2* were designed using online program Web MicroRNA Designer (<http://wmd.weigelworld.org>), and amplified using primer sets *PAL739479* for *PAL1* and *PAL820245* for *PAL2* (see Supplemental Table 5 online). The amplified sequences were integrated into the *Ptr-MIR408-pBII21-4CLXP* construct to generate *4CLP-PAL1a* and *4CLP-PAL2a*. These constructs were transformed into *P. trichocarpa* as described by Song et al., 2006.

Generation of transgenic *P. trichocarpa* with xylem specific downregulation of three *PALs* (*PAL2*, *PAL4* and *PAL5*): To assemble the transformation construct *4CLP-PAL245i*, that target the downregulation of *PAL2*, *PAL4* and *PAL5*, a 284bp fragment was amplified from *PAL4* cDNA (Shi et al. 2010) with primers *i7-SF* and *i7-MI* (see Supplemental Table 5 online), and a 158bp fragment was amplified from *PAL2* cDNA (Shi et al. 2010) with primers *i7-M2* and *i7-SR*. Using these two fragments as template, overlapping PCR (Warrens et al. 1996) was performed to generate a sense fragment with primers *i7-SF/i7-SR* and an antisense fragment with primers *i7-ASF/i7-ASR*. These sense and antisense fragments were sequenced and cloned into *pCR2.1-GL* (Li et al. 2011) at *SpeI/SacI* and *Sall/BamHI*, respectively. The resulting antisense:GL:sense fragment was cloned into *pBII21-4CLXP* at *BamHI/SacI* to generate *4CLXP-PAL245i*. This

## REFERENCES

**Horsch, R.B., Fry, J.E., Hoffmann, N.L., Eichholtz D., Rogers, S.G., Fraley, R.T.** (1985). A simple and general method for transferring genes into plants. *Science* **227**: 1229–1231.

**Li, L., Cheng, X.F., Leshkevich, J., Umezawa, T., Harding, S.A., Chiang, V.L.** (2001). The last step of syringyl monolignol biosynthesis in angiosperms is regulated by a novel gene encoding sinapyl alcohol dehydrogenase. *Plant Cell* **13**: 1567-1586.

**Shi, R., Yang, C., Lu, S., Sederoff, R., Chiang, V.L.** (2010). Specific down-regulation of *PAL* genes by artificial microRNAs in *Populus trichocarpa*. *Planta* **232**: 1281-1288.

**Song, J., Lu, S., Chen, Z.Z., Lourenco, R., Chiang, V.L.** (2006) Genetic Transformation of *Populus trichocarpa* Genotype Nisqually-1: A Functional Genomic Tool for Woody Plants. *Plant Cell Physiol.* **47**: 1582-1589.

**Warrens, A.N., Jones M.D., and Lechler, R.I.** (1996). Splicing by overlap extension by PCR using asymmetric amplification: an improved technique for the generation of hybrid proteins of immunological interest. *Gene* **186**: 29–35.
